# Supplementary material
Source: PubMed Central journal article supplement (PMC10103235)
Supplement: jasn-34-394-s001.pdf [file jasn-34-394-s001.pdf]

## **Tubular epithelial cell HMGB1 promotes AKI-CKD transition by sensitizing cycling tubular cells to oxidative stress. A rationale for targeting intracellular HMGB1 during AKI recovery**

Zhi Bo Zhao<sup>1\*</sup>, Julian A. Marschner<sup>1\*</sup>, Takamasa Iwakura<sup>1</sup>, Chenyu Li<sup>1</sup>, Manga Motrapu<sup>1</sup>, Meisi Kuang<sup>1</sup>, Bastian Popper<sup>2</sup>, Andreas Linkermann<sup>3</sup>, Jan Klocke<sup>4</sup>, Philipp Enghard<sup>4</sup>, Yoshiharu Muto<sup>5</sup>, Benjamin D. Humphreys<sup>5,6</sup>, Helena Erlandsson Harris<sup>7</sup>, Paola Romagnani<sup>8</sup>, Hans-Joachim Anders<sup>1</sup>

1 Nephrologisches Zentrum, Medizinische Klinik und Poliklinik IV, Klinikum der Universität München, LMU München, Germany

2 Biomedical Center, Core Facility Animal Models, LMU München, Germany

3 Division of Nephrology, Department of Internal Medicine 3, University Hospital Carl Gustav Carus at the Technische Universität Dresden, Dresden, Germany

4 Department of Nephrology and Medical Intensive Care, Charité-Universitätsmedizin Berlin, Corporate Member of Freie Universität Berlin and Humboldt-Universität zu Berlin, Germany.

5 Division of Nephrology, Department of Medicine, Washington University in St. Louis, St. Louis, MO, USA

6 Department of Developmental Biology, Washington University in St. Louis, St. Louis, MO, USA

7 Departments of Rheumatology and of Medicine Solna, Center for Molecular Medicine, Karolinska Institutet, Stockholm, Sweden

8 Department of Experimental and Biomedical Sciences "Mario Serio" and Nephrology and Dialysis Unit, Meyer Children's University Hospital, Florence, Italy

### **Supplementary material**

|                                                                                                        |    |
|--------------------------------------------------------------------------------------------------------|----|
| Supplementary table 1: Narcosis, antagonization and analgesia                                          | 2  |
| Supplementary table 2: Antibodies and reagents for immunohistochemical and immunofluorescence staining | 3  |
| Supplementary table 3: PCR reaction mixtures                                                           | 4  |
| Supplementary table 4: Primer pairs used for qPCR and genotyping                                       | 5  |
| Supplementary table 5: Primary murine tubular cell culture medium composition                          | 5  |
| Supplementary table 6: Reagents, antibodies and kits                                                   | 6  |
| Supplementary figure 1                                                                                 | 7  |
| Supplementary figure 2                                                                                 | 8  |
| Supplementary figure 3                                                                                 | 9  |
| Supplementary figure 4                                                                                 | 10 |
| Supplementary figure 5                                                                                 | 11 |
| Supplementary figure 6                                                                                 | 12 |
| Supplementary figure 7                                                                                 | 13 |
| Supplementary video 1                                                                                  | 14 |
| Supplementary video 2                                                                                  | 14 |

**Supplementary table 1: Narcosis, antagonization and analgesia**

| <b>Drug</b>                   | <b>Concentration<br/>[mg/kg BW]</b> | <b>Treatment regime</b>                                                                        | <b>Cat<br/>number</b> | <b>Company</b> |
|-------------------------------|-------------------------------------|------------------------------------------------------------------------------------------------|-----------------------|----------------|
| <b><i>Narcosis</i></b>        |                                     |                                                                                                |                       |                |
| Medetomidine                  | 0.5                                 | i.p. injection, once prior to                                                                  | 07725752              | Zoetis         |
| Midazolam                     | 5                                   | surgery, surgical tolerance                                                                    | 4921530               | ratiopharm     |
| Fentanyl                      | 0.05                                | verified by toe pinching                                                                       | 2084366               | Janssen-Cilag  |
| <b><i>Antagonization</i></b>  |                                     |                                                                                                |                       |                |
| Atipamezol                    | 5                                   | s.c. injection, once                                                                           | 8-00732               | CP-Pharma      |
| Flumazenil                    | 0.1                                 |                                                                                                | 4470990               | Hexal          |
| <b><i>Analgesia</i></b>       |                                     |                                                                                                |                       |                |
| Buprenophin                   | 0.1                                 | i.p. injection, once 30min prior<br>to antagonization, then every<br>8h for 3 consecutive days | 01498870              | Bayer Vital    |
| Metamizol-<br>Natrium<br>1H2O | 200                                 | p.o. application, 5min prior to<br>narcosis induction                                          | 0731672               | Sanofi-Aventis |

**Supplementary table 2: Antibodies and reagents for immunohistochemical and immunofluorescence staining**

| <b>Antibody for antigen<br/>(rabbit anti-mouse)</b> | <b>Target/host</b> | <b>Secondary antibody/ avidin-biotin complex</b> | <b>Dilution/ incubation time</b>  | <b>Cat number</b> | <b>Company</b>      |
|-----------------------------------------------------|--------------------|--------------------------------------------------|-----------------------------------|-------------------|---------------------|
| <b><i>Primary antibodies</i></b>                    |                    |                                                  |                                   |                   |                     |
| LTL, biotinylated                                   | Mouse              | VECTASTAIN                                       | 1:250 PBS/ 1h RT                  | B-1325            | Vector              |
| THP                                                 | Mouse/ rabbit      | Biotinylated goat anti-rabbit IgG/ VECTASTAIN    | 1:2000 (10% milk)/ over night 4°C | sc-20631          | Santa Cruz          |
| Nitrotyrosine                                       | Mouse/ mouse       | Biotinylated rat anti-mouse IgG2a/ VECTASTAIN    | 1:50 (10% milk)/ over night 4°C   | NB110-96877       | Novus Bio           |
| <b><i>Secondary antibodies</i></b>                  |                    |                                                  |                                   |                   |                     |
| IgG (H+L), biotinylated                             | Rabbit/ goat       | -                                                | 1:300 PBS/ 30min RT               | ZRB1001           | Linaris             |
| IgG2a, biotinylated                                 | Mouse/rat          | -                                                | 1:300 PBS/ 30min RT               | 553388            | BD Pharming         |
| <b><i>Avidin-biotin complex/ substrate</i></b>      |                    |                                                  |                                   |                   |                     |
| VECTASTAIN® ABC Kits                                | -                  | -                                                | -                                 | PK6100            | Vector Laboratories |
| 3,3'-Diaminobenzidine                               | -                  | -                                                | -                                 | H54000            | Alfa Aesar          |

**Supplementary table 3: PCR reaction mixtures**

| <b>Reagent</b>                                    | <b>Amount per reaction [μl]</b> | <b>Company</b>           | <b>Cat number</b> |
|---------------------------------------------------|---------------------------------|--------------------------|-------------------|
| <b><i>Reverse transcriptase PCR</i></b>           |                                 |                          |                   |
| dNTP Set<br>(25 mM per base)                      | 0.45                            | Thermo Fisher Scientific | R0186             |
| DTT 0,1 M                                         | 1                               | Thermo Fisher Scientific | 18080085          |
| 5x First Strand Buffer                            | 4.5                             | Thermo Fisher Scientific | 18080085          |
| Hexanucleotide Mix                                | 0.25                            | Roche Diagnostics        | 11277081001       |
| Linear Acrylamide (15 μg/ml)                      | 0.25                            | Thermo Fisher Scientific | AM9520            |
| RNasin R Ribonuclease Inhibitor                   | 0.5                             | Promega                  | N2515             |
| SuperScript TM III Reverse Transcriptase or ddH2O | 0.5                             | Thermo Fisher Scientific | 18080085          |
| <b><i>Quantitative real-time PCR</i></b>          |                                 |                          |                   |
| BioStab PCR Optimizer                             | 4                               | Biomol                   | 62508.5           |
| Bovine Serum Albumin PCR grade                    | 0.2                             | Thermo Fisher Scientific | B14               |
| ddH2O PCR grade                                   | 1.2                             | Invitrogen               | 10977035          |
| dNTP Set (25 mM per base)                         | 0.15                            | Thermo Fisher Scientific | R0186             |
| MgCl 2 25mM                                       | 2.4                             | Thermo Fisher Scientific | R0971             |
| Primer forward 10μM                               | 0.6                             | Metabion international   | -                 |
| Primer reverse 10μM                               | 0.6                             | Metabion international   | -                 |
| SYBR R Green I nucleic acid gel stain             | 0.04                            | Sigma-Aldrich Chemie     | 86205             |
| Taq DNA Polymerase                                | 0.16                            | New England Biolab       | M0273X            |
| 10X Taq Buffer without Detergent                  | 2                               | Thermo Fisher Scientific | B55               |

**Supplementary table 4: Primer pairs used for qPCR and genotyping**

| Target gene | NCBI key       | Forward primer        | Reverse primer       |
|-------------|----------------|-----------------------|----------------------|
| Hmgb1       | XM_024449341.1 | TACTCGGAGAACTTCAGACCG | TAACGAGCCTTGTCAGCCTT |
| Rn18s       | NR_003278.3    | GCAATTATTCATGAACG     | AGGGCCTCACTAAACCATCC |
| Ngal        | NM_008491.1    | ATGTCACCTCCATCCTGG    | GCCACTTGACATTGTAG    |

**Supplementary table 5: Primary murine tubular cell culture medium composition**

| Reagent                                                               | Company                       | Cat number  | Volume |
|-----------------------------------------------------------------------|-------------------------------|-------------|--------|
| DMEM + GlutaMAX™                                                      | Thermo Fisher Scientific      | 21885-025   | 450ml  |
| FBS                                                                   | Biochrom                      | S0115       | 50ml   |
| HEPES Cell culture grade<br>(1M, pH 7.55)                             | AppliChem GmbH                | A3268,9025  | 12.5ml |
| Penicillin/ streptomycin                                              | PAN Biotech GmbH              | P06-07100   | 5ml    |
| Hank's Balanced Salt Solution                                         | Thermo Fisher Scientific Inc. | 14025-092   | 5ml    |
| Epidermal growth factor 12.5ug/ml                                     | Genscript                     | Z02972      | 1ml    |
| Insulin transferrin-sodium selenite<br>supplement 10mg/ml             | Roche Diagnostics GmbH        | 11074547001 | 500ul  |
| Hydrocortisone 1.8ug/ml in ethanol                                    | Sigma-Aldrich                 | H0888       | 50ul   |
| 3,3',5-Triiodo-L-thyronine sodium salt<br>(T3) at 2.4ng/ml in ethanol | Sigma-Aldrich                 | T5516       | 5ul    |
| Prostaglandin E1 125ng/ml in ethanol                                  | Sigma-Aldrich                 | P7527       | 1.25ul |

**Supplementary table 6: Reagents, antibodies and kits**

| <b>Reagent</b>                                              | <b>Company</b>        | <b>Cat number</b> |
|-------------------------------------------------------------|-----------------------|-------------------|
| Cytotoxicity Detection Kit (LDH)                            | Roche Diagnostics     | 11644793001       |
| CellTiter 96® Non-Radioactive Cell Proliferation Assay      | Promega               | G4100             |
| Collagenase IV                                              | Sigma-Aldrich         | C4-BIOC           |
| Collagenase D                                               | Roche Diagnostics     | 1108886600        |
| IgG2b                                                       | Sigma                 | MOPC-195          |
| Percoll®                                                    | Sigma-Aldrich         | P1644             |
| Pre-seperation filter, 70 µm pore diameter                  | Miltenyi Biotec       | 130-095-823       |
| Solubilization/ Stop Solution                               | Promega               | G4101             |
| Breeder Brinsea Octagon 20 Advance                          | J.Hemel Brutgerät     | 32150             |
| FITC-labeled sinistrin                                      | MediBeacon            | NA                |
| Pure Link RNA Mini Kit                                      | Invitrogen            | 12183018A         |
| RET-3-ISO Isolated Rectal Probe for Mice                    | Physitemp Instruments | NA                |
| RNAlater                                                    | Ambion,               | AM7021            |
| Rodent surgery table (heatable)                             | Medax                 | M12511            |
| Suture Ethibond Excel 5-0                                   | Ethicon               | EH7260H           |
| Suture Vicryl TM 5-0                                        | Ethicon               | V493H             |
| Thermes-USB Temperature Data Acquisition Seven channel unit | Physitemp Instruments | NA                |
| Yasargil Aneurysm Clip                                      | Medicon               | 58.54.10          |

## Supplementary figure 1

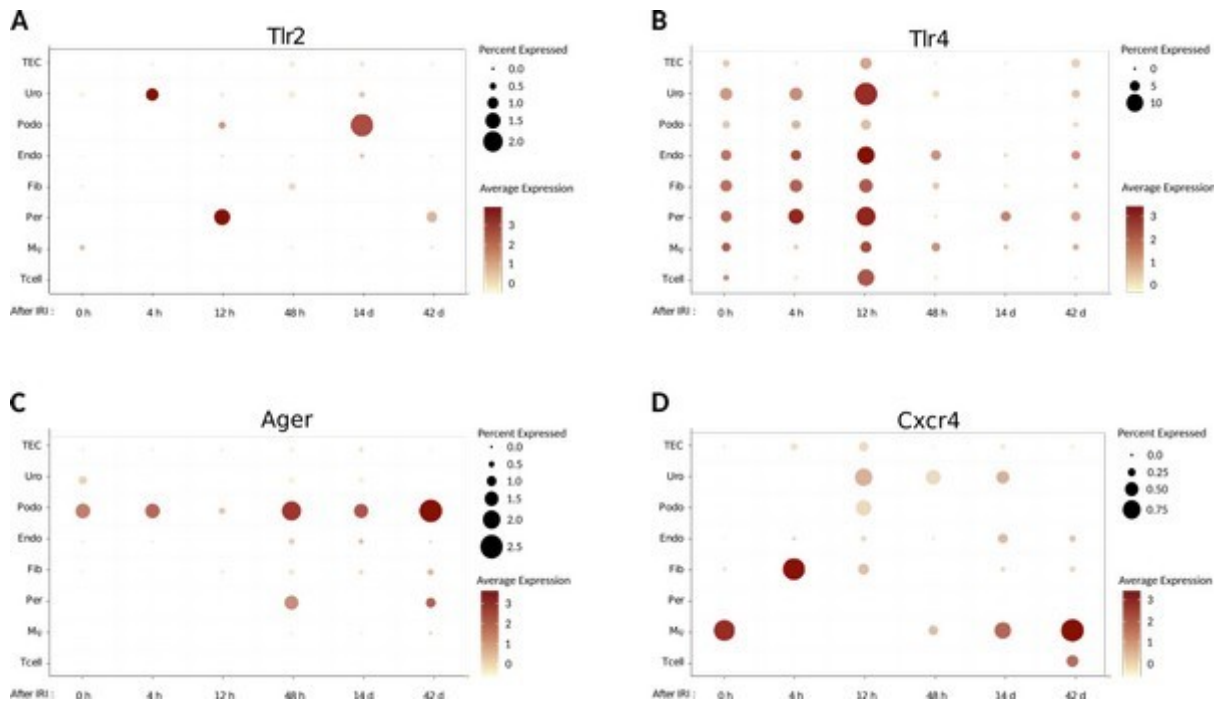

*Expression of HMGB1 receptors in murine kidneys after AKI.* Dot plot of published snRNA-seq dataset showing (A) Tlr2, (B) Tlr4, (C) Ager, and (D) Cxcr4 expression pattern in the proximal tubular cell subtypes along with the time course after bilateral ischemic reperfusion injury (IRI). TEC: Tubular epithelial cells; Uro: Uroepithelial cells; Podo: Podocytes; Endo: Endothelial cells; Fib: Fibroblasts; Per: Pericytes; Mφ: Macrophages; Tcell: T-cells. The diameter of the dot corresponds to the proportion of cells expressing the indicated gene and the density of the dot corresponds to average expression relative to all proximal tubular cells in the whole dataset.

Supplementary figure 2

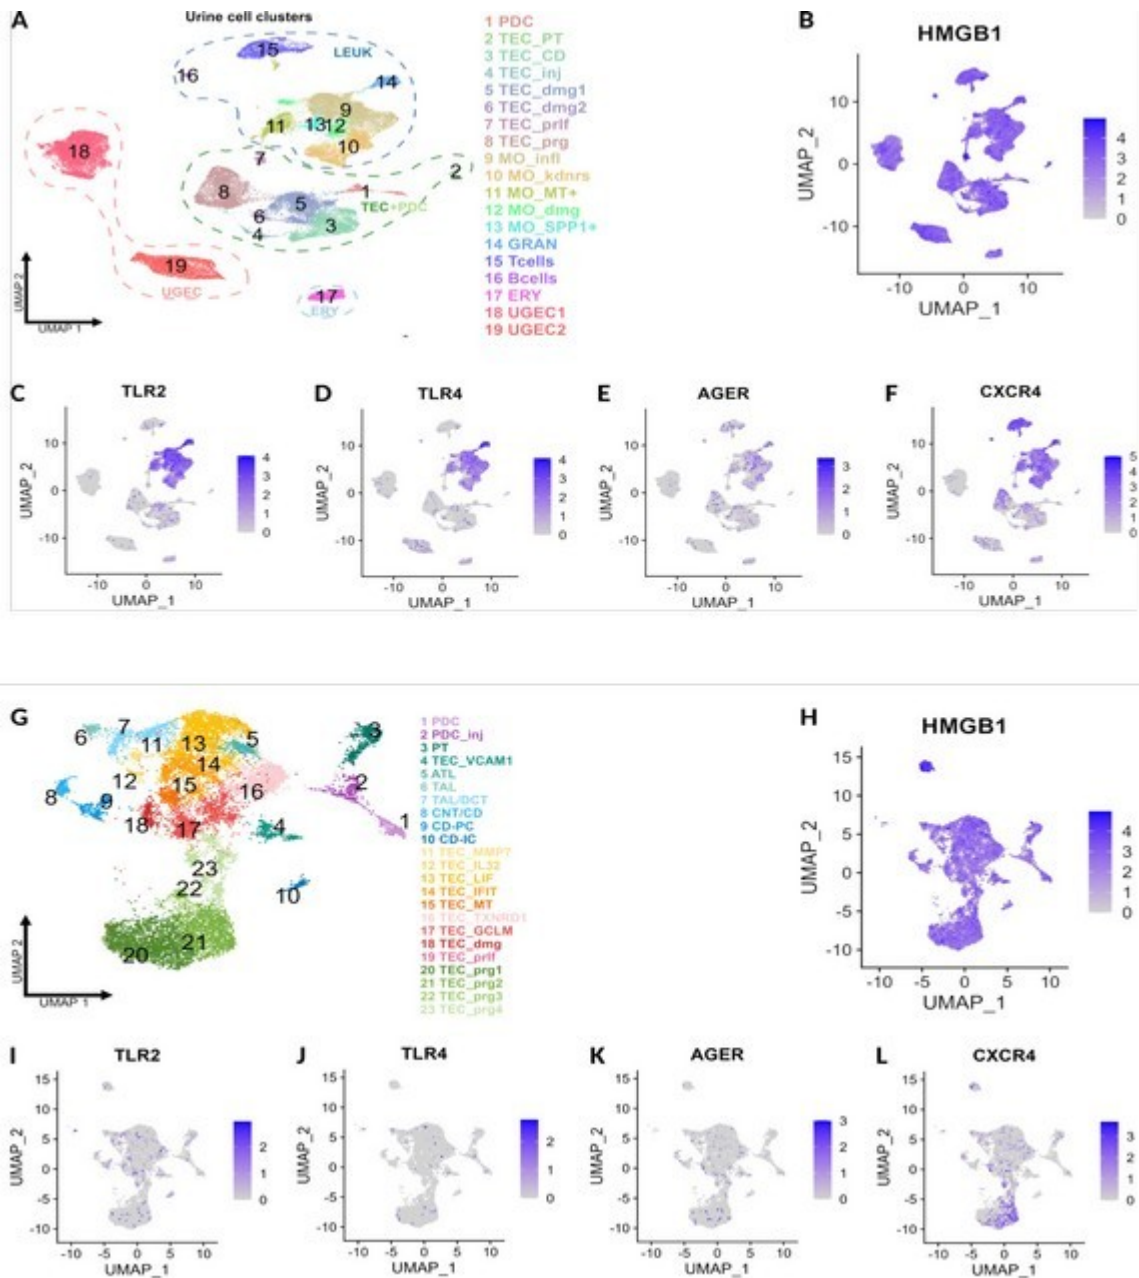

Expression of HMGB1 and its receptors in urine derived human cells. Uniform manifold approximation and projection (UMAP) of 42608 scRNAseq urine transcriptomes from 32 individuals with AKI (Cellular composition is individually diverse but can be broadly grouped into kidney cells (PDC – podocytes, TEC – tubular epithelial cells), urogenital epithelial cells (UGEC) and leukocytes (LEUK) with sporadic contamination of erythrocytes (ERY)) (A) and a subsetted UMAP of 12853 urinary renal parenchymal scRNAseq transcriptomes from the same cohort (G). The magnitude of normalized expression of HMGB1 (B, H), TLR2 (C, I), TLR4 (D, J), AGER (E, K), and CXCR4 (F, L) is depicted by color code (gray to purple). PT – proximal tubule, ATL – ascending thin limb, TAL – thick ascending limb, DT – distal tubule, CNT – connecting tubule, CD-PC – collecting duct principal cells, CD-IC – collecting duct intercalated cells, MO – monocytes/macrophages, GRAN – granulocytes, inj – injured, dmg –



damaged, prlf – proliferating, prg – progenitor-like, infl – inflammatory, kdhrs – kidney resident.

### Supplementary figure 3

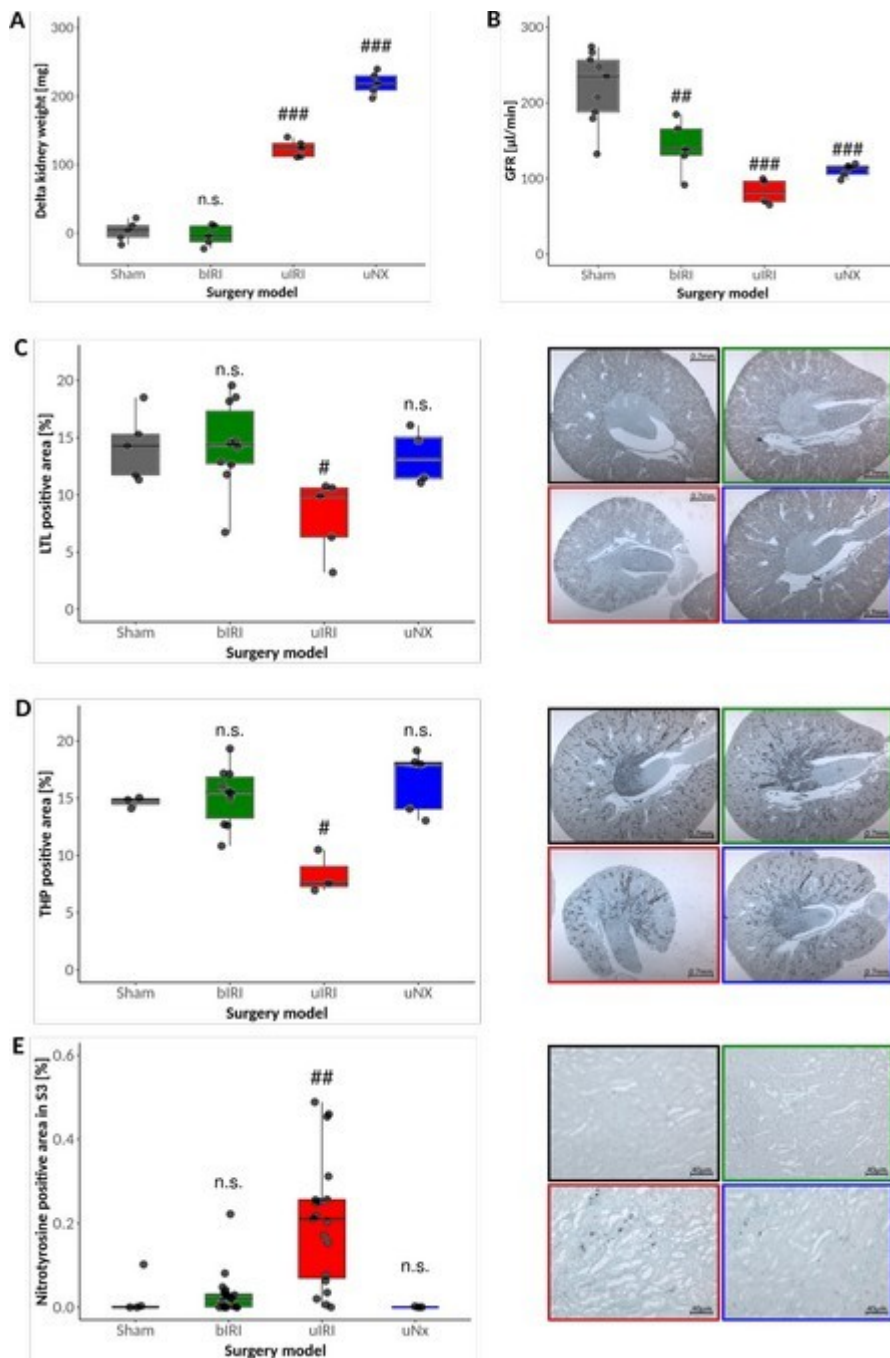

Ischemic necroinflammation followed by persistent hypoxia leads to kidney atrophy. C57BL/6N mice underwent either sham surgery, 20 min of bilateral IRI (bIRI), 40 min of unilateral IRI (uIRI), or uninephrectomy (uNX). The latter was used as a control to assess the effect of compensatory hypertrophy of the residual kidney on GFR. All data were collected at day 30 after surgery. **(A)** Delta kidney weight [mg] as an indicator of renal atrophy and compensatory hypertrophy of the contralateral kidney in response to the surgery model. **(B)** GFR [ $\mu$ l/min] for the same conditions as in (A). Semi-quantitative **(C)** proximal and **(D)** distal tubular mass assessment for the same conditions as in (A). **(E)** Nitrotyrosine positive area in the S3 segment as a marker of hypoxia for the same conditions as in (A). \*/#  $p < 0.05$ , \*\*/###  $p < 0.01$ , \*\*\*/###  $p < 0.001$ . Data presented in this figure are derived from three independent experiments.

## Supplementary figure 4

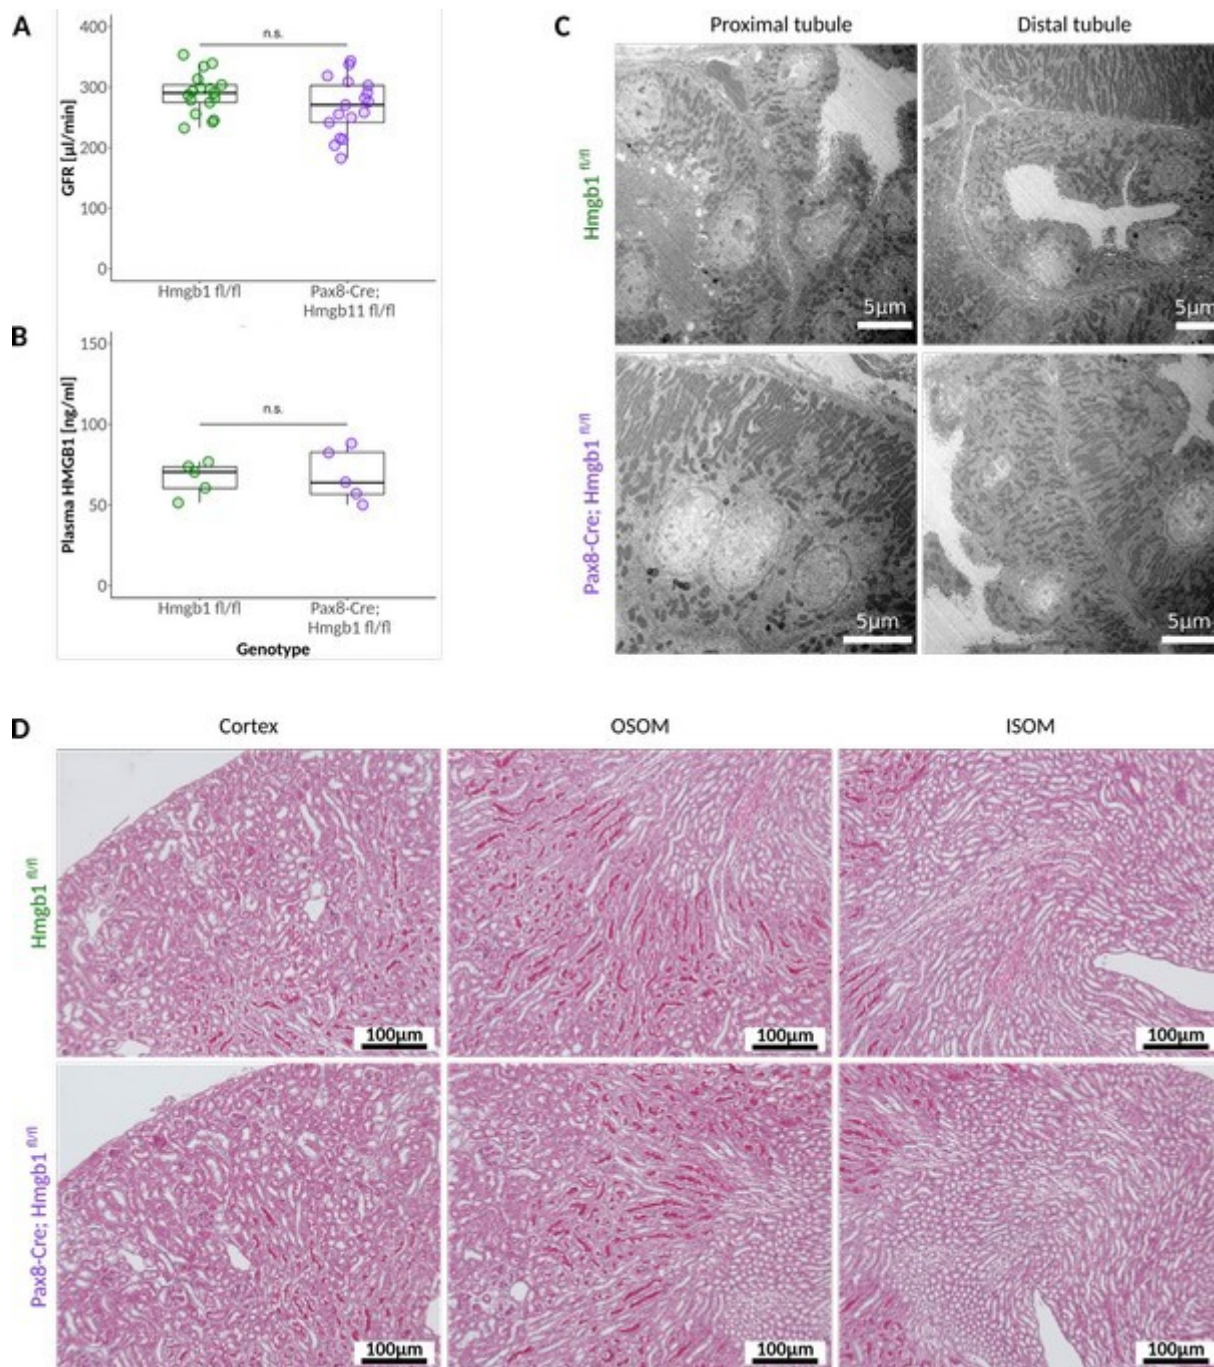

Genetic depletion of Hmgb1 from tubules of adult mice shows no spontaneous phenotype. Hmgb1<sup>fl/fl</sup> and Pax8-Cre; Hmgb1<sup>fl/fl</sup> mice remained unchallenged and underwent (A) GFR measurement at 20 weeks of age. (B) Plasma HMGB1 levels of both genotypes at day 30 after IRI. (C) TEM images (D) and representative PAS of both genotypes at 20 weeks of age.



## Supplementary figure 5

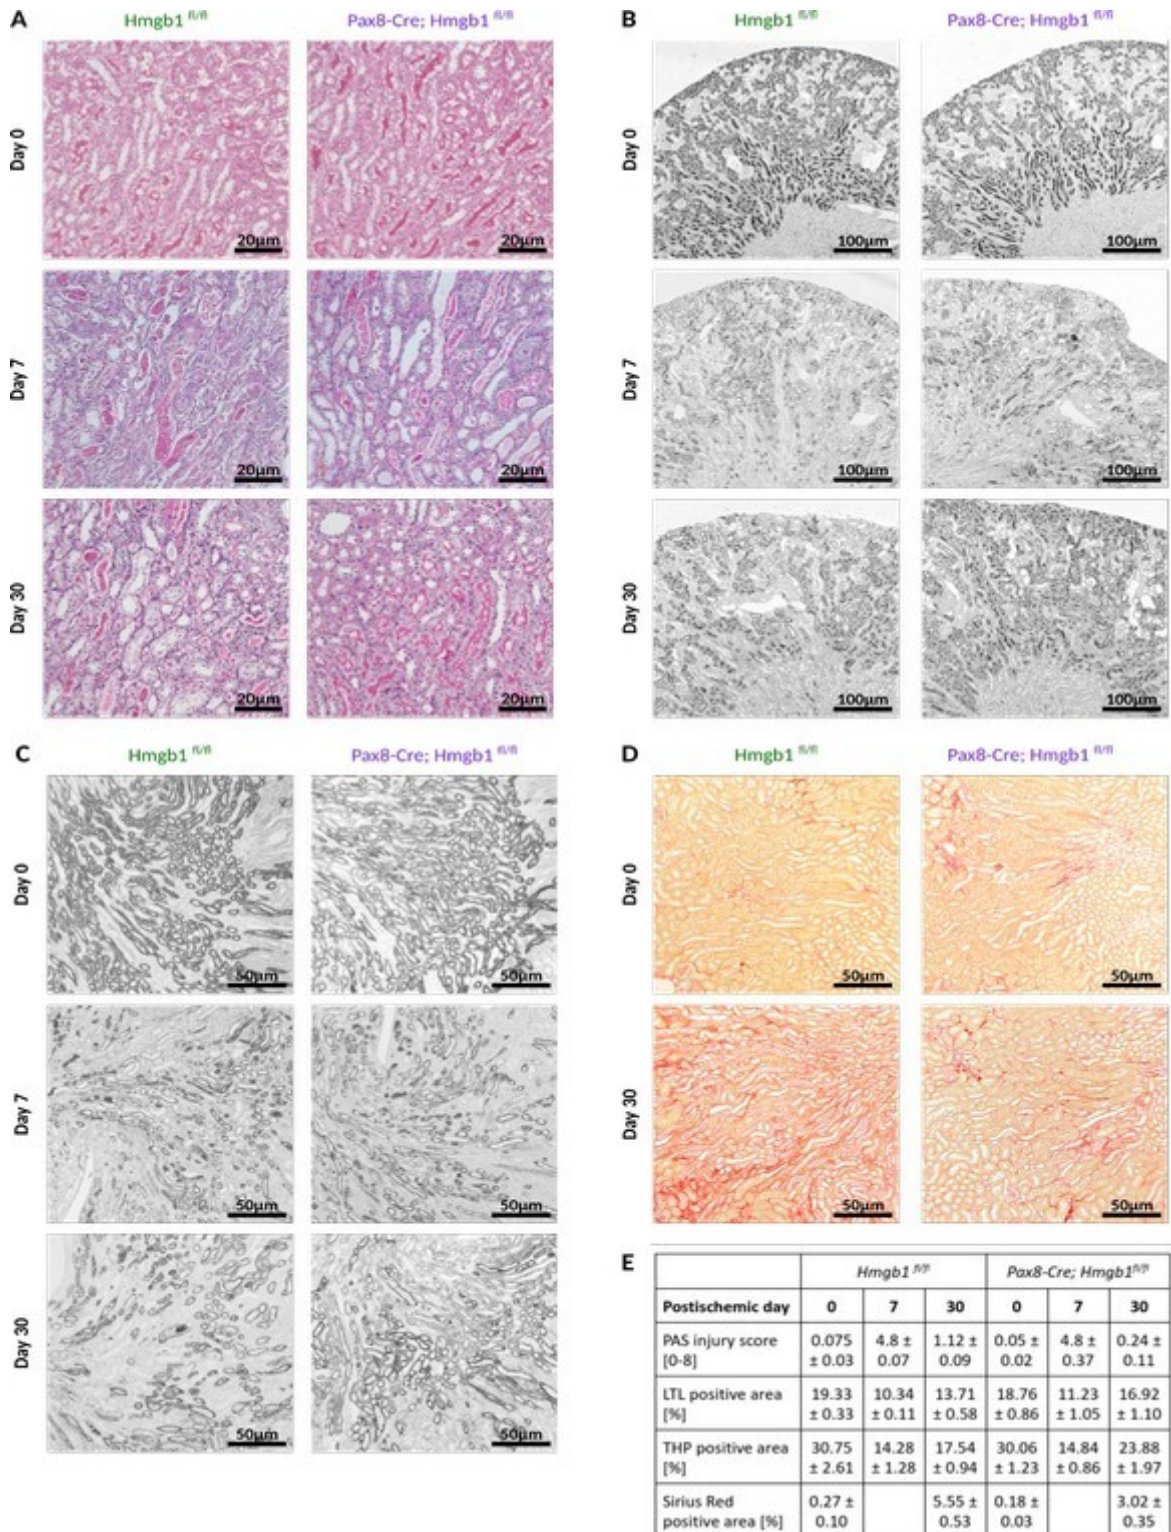

Tubular HMGB1 deficiency does not attenuate ischemic AKI but AKI/CKD transition. Representative images (A-D) and quantification (E) of kidneys from sham operated (day 0) and postischemic (day 7, day 30) Hmgb1<sup>fl/fl</sup> and Pax8-Cre; Hmgb1<sup>fl/fl</sup> mice. (A) PAS staining, (B) Lotus tetragonolobus lectin staining, (C) Tamm-Horsfall-protein staining, and (D) Sirius

red staining. (E) Values given in each cell are mean  $\pm$  standard error of the mean (SEM). Data presented in this figure are derived from at least two independent experiments.

Supplementary figure 6

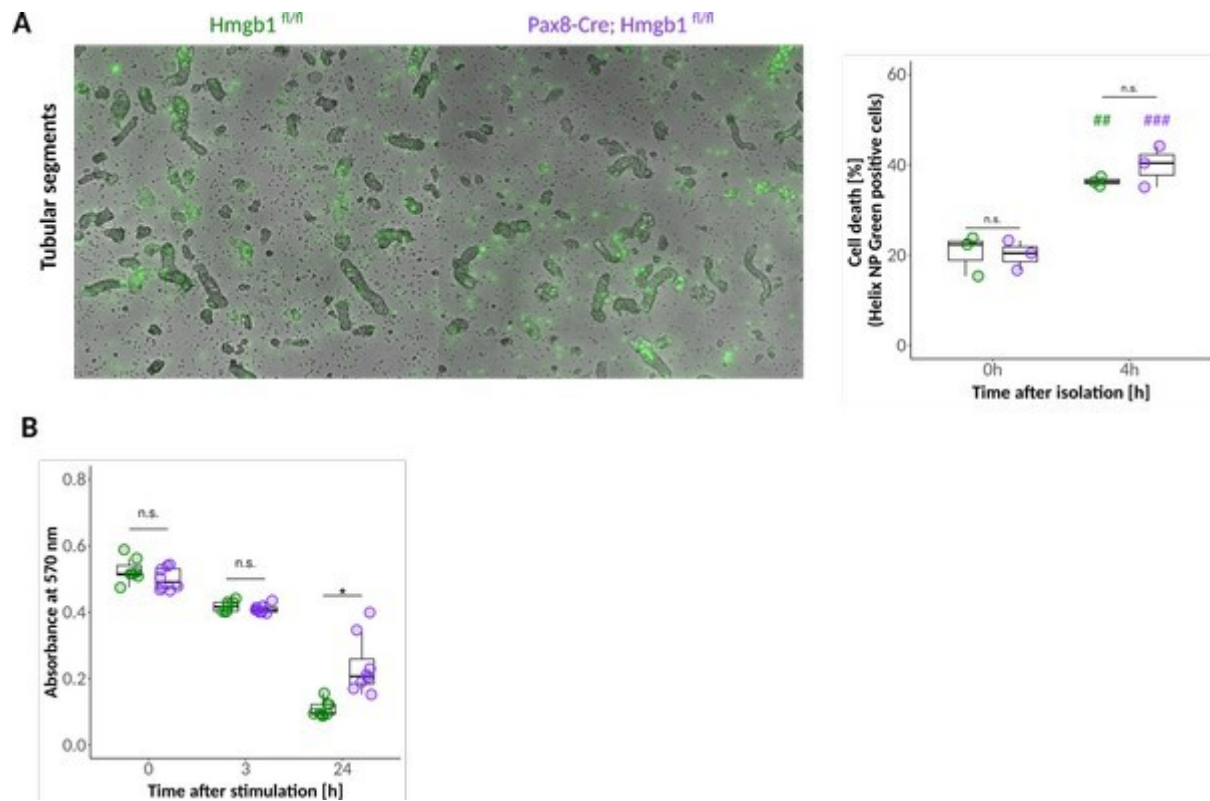

*HMGB1* affects the susceptibility of tubular cells to prolonged oxidative stress. **(A)** Helix NP green cell death assay for primary murine TEC isolates at 0 and 4 h after isolation and representative pictures at 4 h in response to genotype. **(B)** Metabolic activity of primary TECs of both genotypes in dependence of time after treatment with 1 mM H<sub>2</sub>O<sub>2</sub>.



## Supplementary figure 7

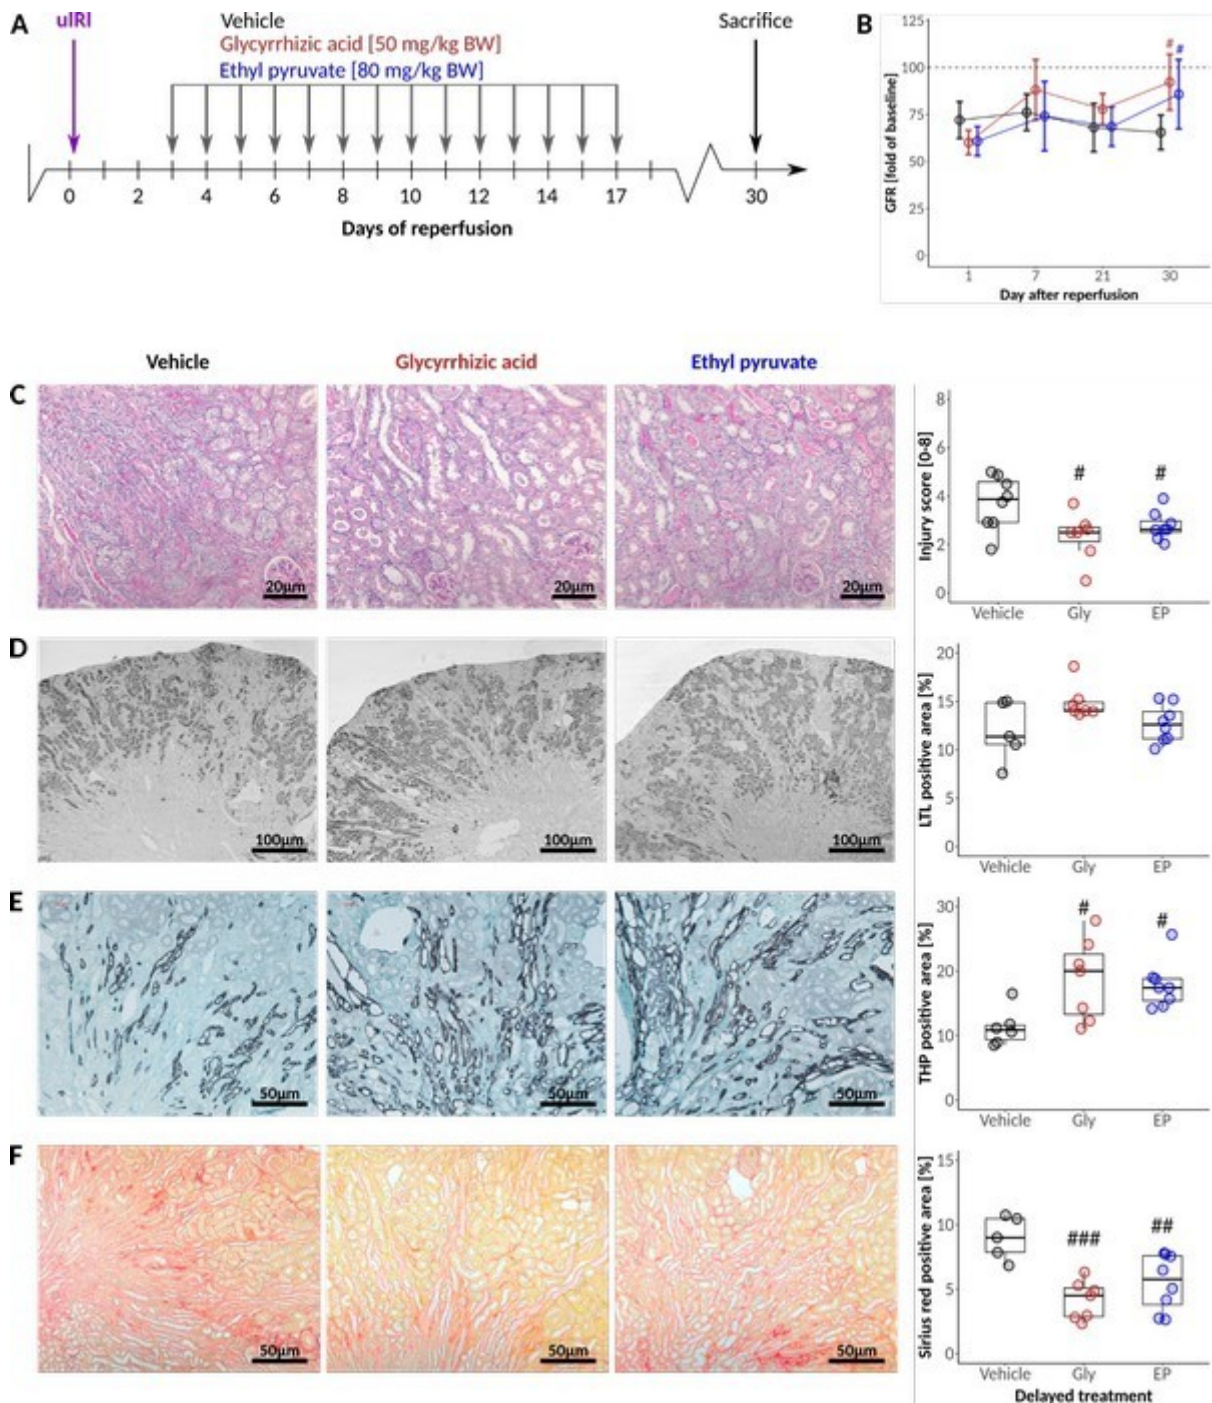

*Delayed onset treatment with HMGB1 inhibitors ameliorates post-ischemic phenotypes.* **(A)** C57BL6/J mice were challenged with 17 min unilateral IRI and treated with Gly and EP at the indicated time points, with the onset of treatment 72 h after reperfusion. **(B)** Changes in GFR (pre-surgery values for each mouse defined as 100%) after IRI in response to vehicle, Gly and EP treatment. Quantification and representative images for **(C)** semi-quantitative injury scoring based on PAS stainings, **(D)** proximal and **(E)** distal tubular mass assessment, and **(F)** fibrosis staining at 30 days after IRI. \*/# p < 0.05 Data presented in this figure are derived from two independent experiments.

### **Supplementary video 1**

The mp4-file shows time-lapse images of the experiments conducted and presented in supplementary figure 6A.

### **Supplementary video 2**

The mp4-file shows time-lapse images of the experiments conducted and presented in main figure 5A.
